# Supplementary material for: Modifying the reactivity in the homologation of propane by introducing aryloxide ligands on a silica supported zirconium alkyl system
Source: Royal Society of Chemistry journal article supplement (doi:10.1039/b708883c), 2007-01-01
Supplement: b708883c.pdf [file b708883c.pdf]

Supporting Information for

**Modifying the Reactivity in the Homologation of Propane by Introducing  
Aryloxy Ligands on Silica Supported Zirconium Alkyl System**

Geoffroy Guillemot, Chloé Thieuleux,\* Christophe Copéret, Daravong Soulivong, Stefan  
Spitzmesser, and Jean-Marie Basset\*

*Contribution from Laboratoire de Chimie Organométallique de Surface (UMR 9986 CNRS / ESCPE Lyon),  
ESCPE Lyon, 43 Boulevard du 11 Novembre 1918, F-69616 Villeurbanne Cedex, France and INEOS Rue  
de Ransbeek 310, 1120 Brussels, Belgium*

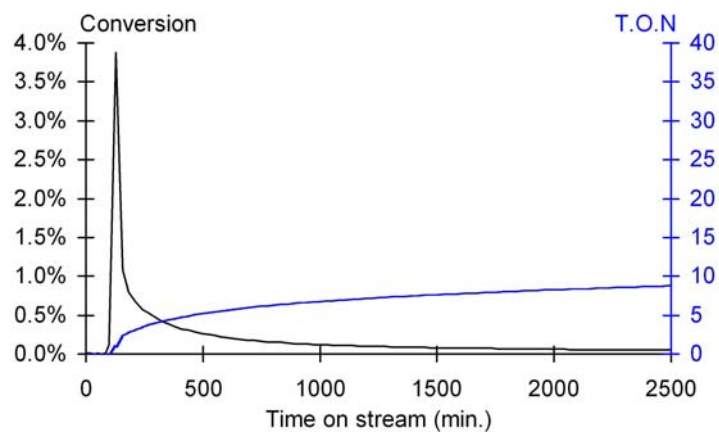

**Figure S1.** Conversion as a function of time (black line) and TON as a function of time (blue line).

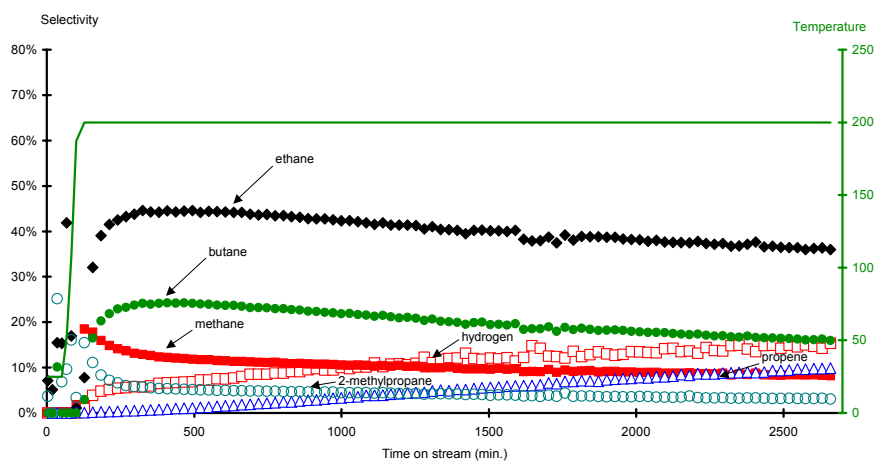

**Figure S2.** Selectivities as a function of time.

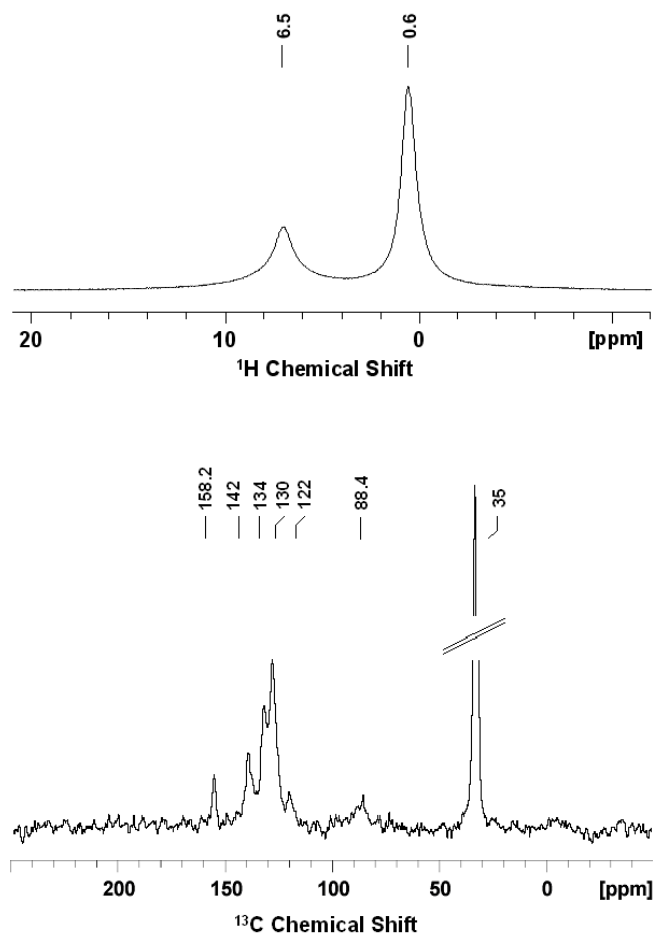

**Figure S3.**  $^1\text{H}$  MAS solid-state NMR (top) and  $^{13}\text{C}$  CP-MAS solid-state NMR (bottom) of **2**/ $\text{SiO}_2$ -[700] (recorded under MAS of 10 kHz).

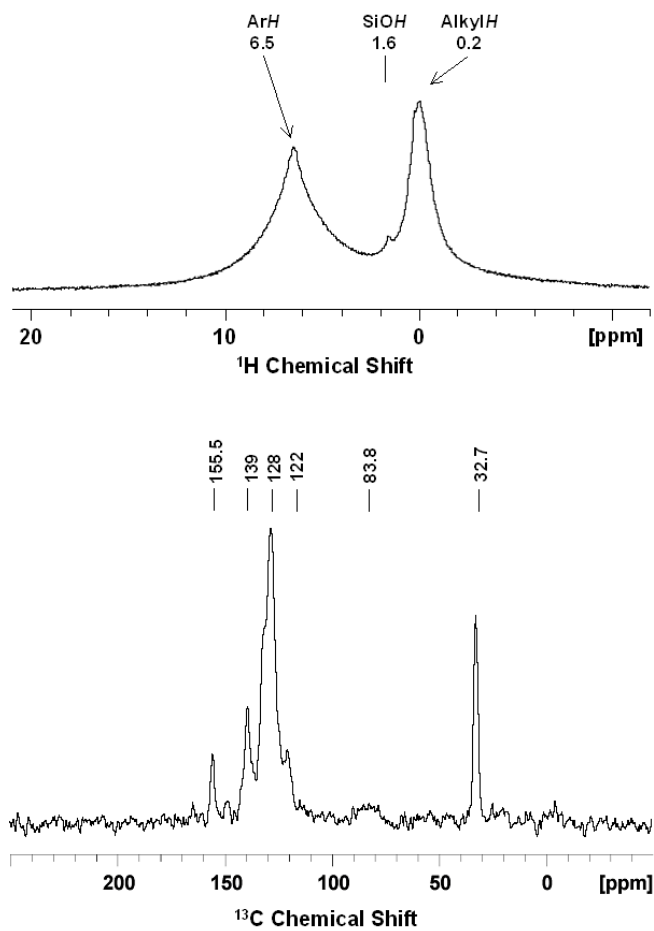

**Figure S4.**  $^1\text{H}$  MAS solid-state NMR (top) and  $^{13}\text{C}$  CP-MAS solid-state NMR (bottom) of  $3/\text{SiO}_2\text{-}[700]$  (recorded under MAS of 10 kHz).
